# Supplementary material for: High density optical neuroimaging predicts surgeons’s subjective experience and skill levels
Source: PLoS One. 2021 Feb 18;16(2):e0247117. doi: 10.1371/journal.pone.0247117 (PMC7891714; doi:10.1371/journal.pone.0247117)
Supplement: S3 Table — (See Fig 3). (XLSX) [file pone.0247117.s004.xlsx]

## Sheet: S3 Table
	S3 Table. Prefrontal activations associated with high and low NASA-TLX scores (See Fig3)
	Mean ± std. dev.		150				212				300				335
			Right		Left		Right		Left		Right		Left		Right		Left
			High	Low	High	Low	High	Low	High	Low	High	Low	High	Low	High	Low	High	Low
		Task 1	0.6±0.2	1.0±0.6	0.7±0.2	1.2±0.8	1.2±0.6	1.4±0.7	2.1±2.1	1.6±1.4	0.7±0.3	0.9±0.5	0.8±0.3	0.8±0.5	1.3±1.4	2.8±3.3	2.0±1.4	1.4±1.4
		Task 2	0.7±0.2	0.7±0.2	0.7±0.2	0.8±0.3	1.9±1.8	1.5±0.9	1.4±1.2	2.2±2.2	0.8±0.4	0.8±0.4	0.7±0.4	0.8±0.3	1.0±0.8	3.0±3.6	1.5±1.7	2.6±2.4
	p-values
			Right	Left	High	Low	Right	Left	High	Low	Right	Left	High	Low	Right	Left	High	Low
			High v Low	High v Low	RIght v Left	RIght v Left	High v Low	High v Low	RIght v Left	RIght v Left	High v Low	High v Low	RIght v Left	RIght v Left	High v Low	High v Low	RIght v Left	RIght v Left
		Task 1	0.0007	0.0003	0.5481	0.0007	0.583	0.0803	0.6355	0.583	0.5435	0.0033	0.2364	0.5435	0.0836	0.0401	0.0534	0.0836
		Task 2	0.0015	0.3221	0.5901	0.0015	0.3258	0.946	0.3804	0.3258	0.0122	0.3164	0.0819	0.0122	0.0072	0.0475	0.1841	0.0072
